# Supplementary material
Source: MDPI journal article supplement (https://www.mdpi.com/2311-5637/9/1/53)
Supplement: s1 [file s1]

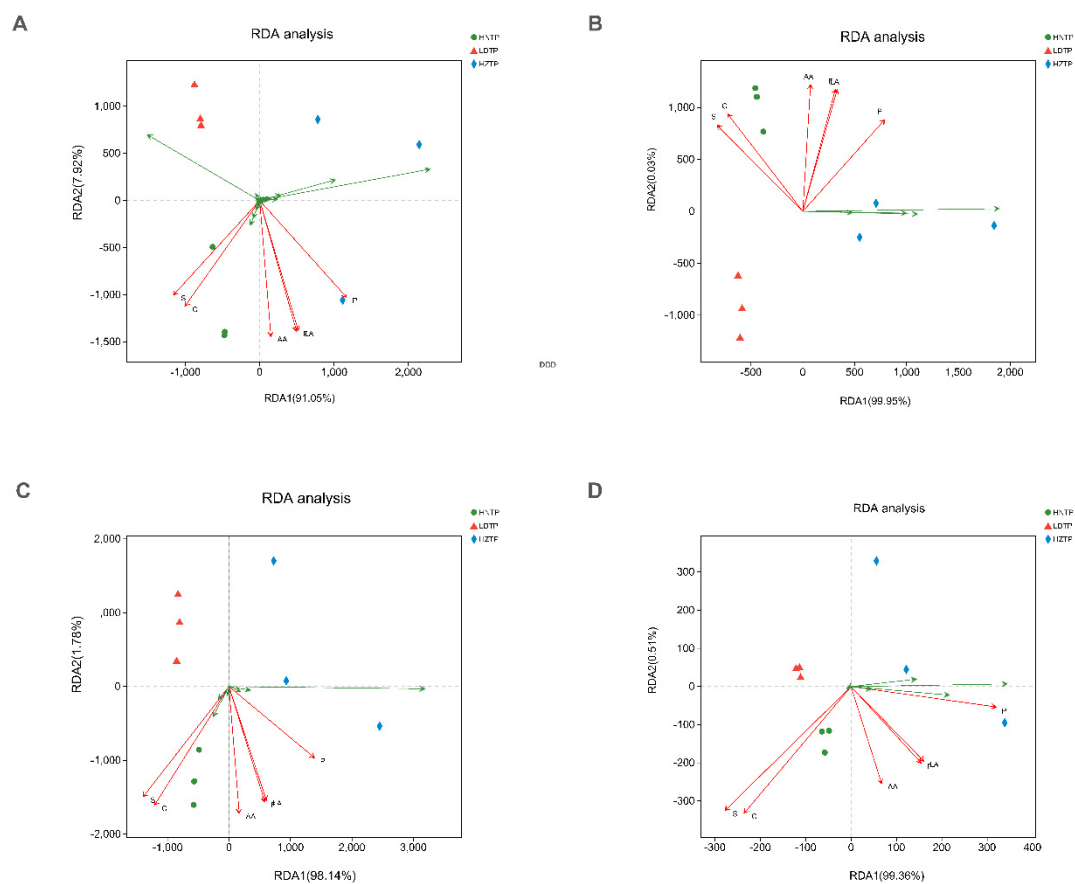

Supplementary Figure S1. Correlation among microbial taxa, functions and Tianpei properties: (A) RDA of NR; (B) RDA of COG; (C) RDA of KEGG; (D) RDA of KEGG.

A

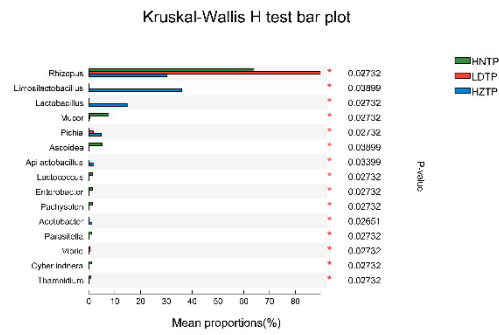

B

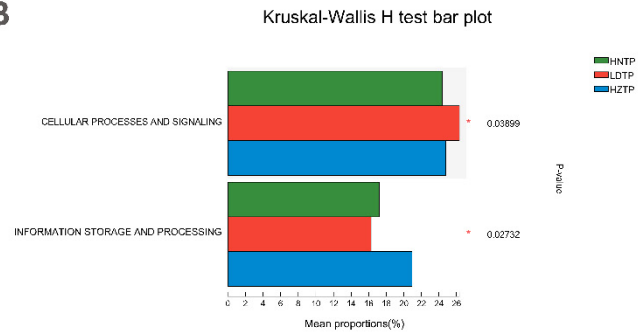

C

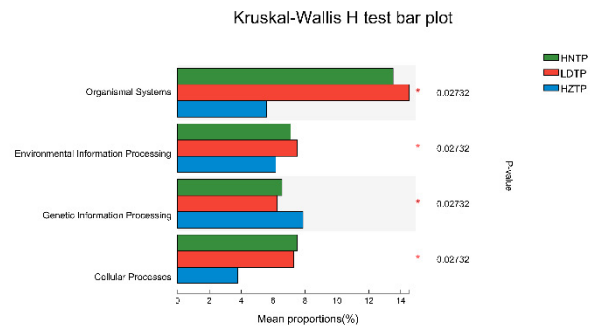

D

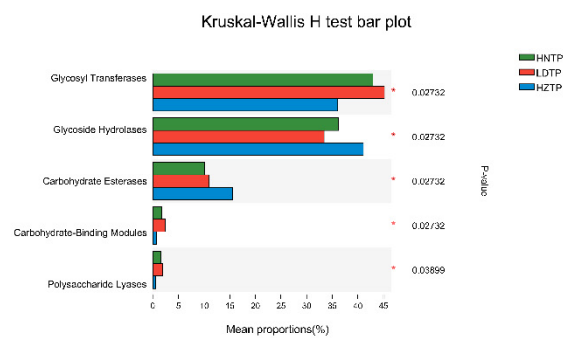

Supplementary Figure S2. Analysis of taxa and functional differences:  
(A) NR; (B) COG; (C) KEGG; (D) KEGG.

**Supplementary Table S1 Chemical properties of Tianpei samples**

| Sample | LA<br>(g/L) | F<br>(mg/g) | AA<br>(mg/g) | P<br>(mg/g) | S<br>(g/100g) | C<br>(mg/g) | FA<br>(μmol/L) | RS<br>(mg/g) |
|--------|-------------|-------------|--------------|-------------|---------------|-------------|----------------|--------------|
| HNTF   | 38.2±0.2    | 4.45±0.03   | 26.56±0.06   | 162.57±0.15 | 51.34±0.05    | 16.78±0.06  | 223.3±0.6      | 226.1±0.3    |
| LDTP   | 20.3±0.3    | 1.82±0.02   | 24.25±0.23   | 126.56±0.03 | 48.34±0.03    | 14.45±0.05  | 143.5±0.5      | 209.2±0.4    |
| HZTP   | 32.4±0.2    | 3.56±0.02   | 25.08±0.15   | 169.42±0.25 | 46.45±0.06    | 13.59±0.02  | 198.6±0.5      | 215.2±0.5    |

LA—lactic acid, F—Flavonoid, AA—amino acid, P—soluble protein, S—starch, C—cellulose, FA—free fatty acid, RS—reducing sugar.

**Supplementary Table S2 Analysis of QS abundance among Tianpei samples**

| Sample | activator | autoinducer | autoinducer_pr<br>oducer | autoinducer_recept<br>or | decompose | effector | regulator | repressor | transporter | unclear   |
|--------|-----------|-------------|--------------------------|--------------------------|-----------|----------|-----------|-----------|-------------|-----------|
| HNTF   | 6812      | 168,064.7   | 506.6                    | 164.7                    | 70,544.7  | 44.6     | 54,870.6  | 6758      | 182,528     | 950,914.7 |
| LDTP   | 3900      | 119,530.7   | 511.3                    | 217.3                    | 49,314.6  | 0        | 34,982.6  | 4048.6    | 108,902.7   | 651,814   |
| HZTP   | 3554.6    | 601,664     | 246                      | 7318                     | 188,072.6 | 0        | 225,360.6 | 27,284    | 991,520.6   | 414,721.7 |

**Supplementary Table S3 Secretion proteins of microbial  
communities among Tianpei samples**

| Samples | Sec_TRUE | Sec_FALSE | TRUE_percent | Total   |
|---------|----------|-----------|--------------|---------|
| HNTF    | 9436     | 175,427   | 5.1          | 184,864 |
| HZTP    | 4989     | 96,272    | 4.9          | 101,261 |
| LDTP    | 4112     | 79,119    | 4.9          | 83,231  |

**Supplementary Table S4 Chemical properties of lab-made Tianpei  
samples**

| Sample | LA<br>(g/L) | F<br>(mg/g) | AA<br>(mg/g) | P<br>(mg/g) | S<br>(g/100g) | C<br>(mg/g) | FA<br>(μmol/L) | RS<br>(mg/g) |
|--------|-------------|-------------|--------------|-------------|---------------|-------------|----------------|--------------|
| TP     | 35.8±0.3    | 4.52±0.02   | 28.06±1.02   | 165.35±0.18 | 47.45±0.06    | 16.89±0.05  | 225.2±1.08     | 228.3±0.6    |

LA—lactic acid, F—Flavonoid, AA—amino acid, P—soluble protein, S—starch, C—cellulose, FA—free fatty acid, RS—reducing sugar
